# Supplementary material for: The relationship and difference between delay detection ability and judgment of sense of agency
Source: PLoS One. 2019 Jul 9;14(7):e0219222. doi: 10.1371/journal.pone.0219222 (PMC6615602; doi:10.1371/journal.pone.0219222)
Supplement: S1 File — (XLSX) [file pone.0219222.s001.xlsx]

## Sheet: result
	delay PSE	SoA_PSE	EPA -100	EPA 0	EPA 100
1	413	539	0	0	1
2	138.7	327.8	0	0	0
3	200	427.4	0	0	1
4	150	273.2	0	1	0
5	193	414.2	1	1	1
6	394.8	597	1	1	1
7	104.3	670	0	0	1
8	161.3	768.2	0	0	0
9	125.5	636.3	2	1	0
10	72.45	710.8	0	1	1
11	100	901.5	0	0	1
12	266.4	620.1	1	0	2
13	140	629	0	0	0
14	182.4	422.6	0	1	1
15	250	781.6	0	1	0
16	125.4	607.3	0	1	0
17	100.9	668.5	0	0	1
18	189.8	550.2	1	0	0
19	192.4	404.9	1	0	0
20	193.2	541.8	0	0	0
21	190	718.8	0	0	0
22	189.5	988.1	0	1	1
23	184.2	310.6	0	1	1
24	190	651.9	0	0	1
25	208.7	726.9	0	0	0
26	190.2	338.7	0	0	0
27	110.3	339.3	0	1	2
28	150	395.7	0	0	0
29	100	349.8	1	1	1
30	445.8	907.4	0	0	0
31	97.95	390	1	0	0
32	182.8	304.1	0	0	0
33	106.8	196.1	0	0	0
34	195.8	675	1	0	0
35	195.6	711.2	0	0	0
36	61.31	893	0	0	0
37	232.3	475.4	0	1	0
38	161.3	307.2	0	0	1
39	90.04	310	0	0	0
40	117.8	351.2	0	0	0
41	290.7	404.9	0	0	0
42	200	574.4	0	0	0
43	183.2	563.4	0	0	2
44	180.1	399	0	0	0
45	250	818.8	0	0	0
46	193.1	670.3	0	0	0
47	104.3	470.1	1	1	0
48	127.8	616.1	0	0	0
49	317.4	902.8	0	0	0
50	182.6	706.3	0	0	0
51	221.5	521.6	0	0	0
52	99.14	389.2	0	0	0
53	138.7	598.9	0	1	1
54	297.8	878.1	0	0	0
55	204	656.9	0	0	0
56	204	658.2	1	1	2
57	200	605.6	0	0	0
58	180.3	557.5	0	0	0
